# Supplementary material
Source: PubMed Central journal article supplement (PMC3821873)
Supplement: NIHMS519910-supplement-1.pdf [file NIHMS519910-supplement-1.pdf]

## SUPPLEMENTARY TABLES

| <b>Supplementary Table 1. Differentially expressed and regulated gene calls between Nes<sup>peri</sup> and Nes<sup>retic</sup> cells from RNA-seq analysis</b> |     |
|----------------------------------------------------------------------------------------------------------------------------------------------------------------|-----|
| Differentially expressed genes                                                                                                                                 | 540 |
| Differentially expressed coding sequences                                                                                                                      | 475 |
| Differentially expressed isoforms                                                                                                                              | 502 |
| Differentially expressed TSS groups                                                                                                                            | 521 |
| Genes with differential promoter use                                                                                                                           | 47  |
| Genes with differential CDS output                                                                                                                             | 82  |

Gene calls with p-value<0.05 from Cuffdiff differential expression analysis were summarized and shown.

| <b>Supplementary Table 2. Distinct vascular niches in bone marrow</b> |                                                                |                                                              |
|-----------------------------------------------------------------------|----------------------------------------------------------------|--------------------------------------------------------------|
|                                                                       | Arteriole niche                                                | Sinusoid niche                                               |
| Morphology                                                            | pericytic                                                      | reticular                                                    |
| Phenotype                                                             | NG2 <sup>+</sup> ; Nestin <sup>brigt</sup> ; LepR <sup>-</sup> | LepR <sup>+</sup> ; Nestin <sup>dim</sup> ; NG2 <sup>-</sup> |
| HSC niche factor expression                                           | +++                                                            | ++                                                           |
| Sympathetic innervation                                               | +++                                                            | +                                                            |
| Endothelial adhesion molecule expression                              | +                                                              | +++                                                          |
| Endothelial fenestration                                              | No                                                             | Yes                                                          |

**Supplementary Table 3. Primers used for Q-PCR**

| <b>Primers</b>                     | <b>Sequence</b>                                      | <b>Annealing(°C)</b> |
|------------------------------------|------------------------------------------------------|----------------------|
| <i>Cxcl12_F</i><br><i>Cxcl12_R</i> | CGCCAAGGTCGTCGCCG<br>TTGGCTCTGGCGATGTGGC             | 60                   |
| <i>Angpt1_F</i><br><i>Angpt1_R</i> | CTCGTCAGACATTCATCATCCAG<br>CACCTTCTTTAGTGCAAAGGCT    | 60                   |
| <i>Vcam1_F</i><br><i>Vcam1_R</i>   | GACCTGTTCCAGCGAGGGTCTA<br>CTTCCATCCTCATAGCAATTAAGGTG | 60                   |
| <i>Kitl_F</i><br><i>Kitl_R</i>     | CCCTGAAGACTCGGGCCTA<br>CAATTACAAGCGAAATGAGAGCC       | 60                   |
| <i>Opn_F</i><br><i>Opn_R</i>       | TCCCTCGATGTCATCCCTGTTG<br>GGCACTCTCCTGGCTCTCTTTG     | 60                   |
| <i>Gapdh_F</i><br><i>Gapdh_R</i>   | TGTGTCCGTCGTGGATCTGA<br>CCTGCTTCACCACCTTCTTGA        | 60                   |
| <i>Ki67_F</i><br><i>Ki67_R</i>     | ACCGTGGAGTAGTTTATCTGGG<br>TGTTTCCAGTCCGCTTACTTCT     | 60                   |
| <i>Pcna_F</i><br><i>Pcna_R</i>     | TTTGAGGCACGCCTGATCC<br>GGAGACGTGAGACGAGTCCAT         | 60                   |
